# Supplementary material for: Polysorbate 80-containing ionizable lipid nanoparticles for mRNA delivery
Source: Royal Society of Chemistry journal article supplement (doi:10.1039/d4bm00523f), 2024-01-01
Supplement: d4bm00523f1.pdf [file d4bm00523f1.pdf]

## Supplementary Information Appendix

### Polysorbate 80-containing ionizable lipid nanoparticles for mRNA delivery

Xuefeng Tang<sup>‡</sup>, Shixiao Ding<sup>‡</sup>, Shilin Yang, Yuqiao Cheng, Hanyu Liu, Kexin Chen and Xiaojun Han\*

#### Supporting Information Figures

Table S1 Formulation of iLNPs with diverse molar ratio of PS80

| Name | MC3 (%) | DOPC (%) | Chol (%) | PS80 (%) |
|------|---------|----------|----------|----------|
| 1    | 50      | 10       | 39.8     | 0.2      |
| 2    | 50      | 10       | 39.6     | 0.4      |
| 3    | 50      | 10       | 39.4     | 0.6      |
| 4    | 50      | 10       | 39.2     | 0.8      |
| 5    | 50      | 10       | 39.0     | 1.0      |

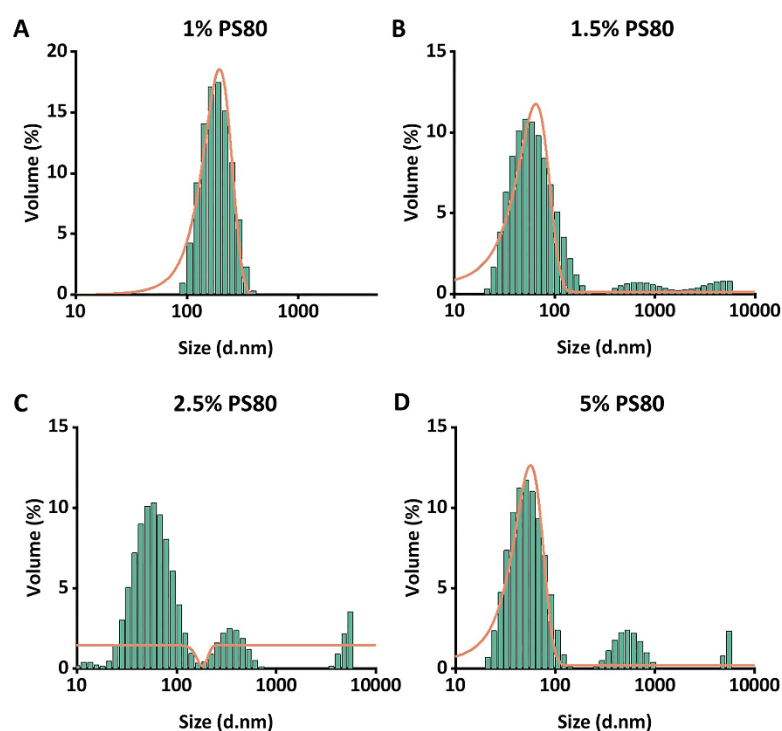

Figure S1† Size distribution of 1.0% (A), 1.5% (B), 2.5% (C), and 5.0% (D) PS80-iLNPs detected by DLS.

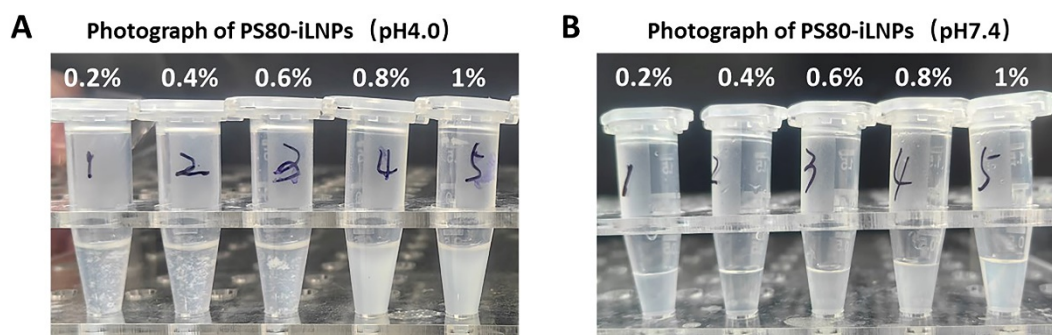

Figure S2† Photographs of iLNPs disperse state containing different molar ratio PS80 in pH 4 (A) and pH 7.4 (B).

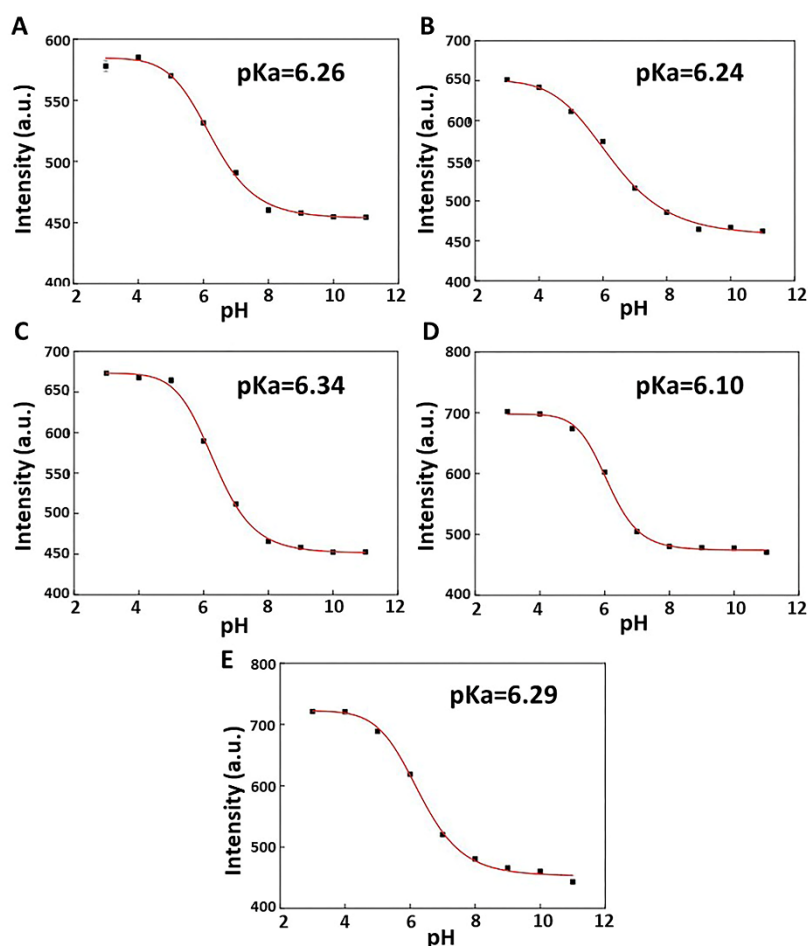

Figure S3† TNS assay. Fluorescence values of 0.2% (A), 0.4% (B), 0.6% (C), 0.8% (D), 1.0% (E) PS80-iLNPs (0.2 - 1.0%) at different pH values and S-type fitting curves.

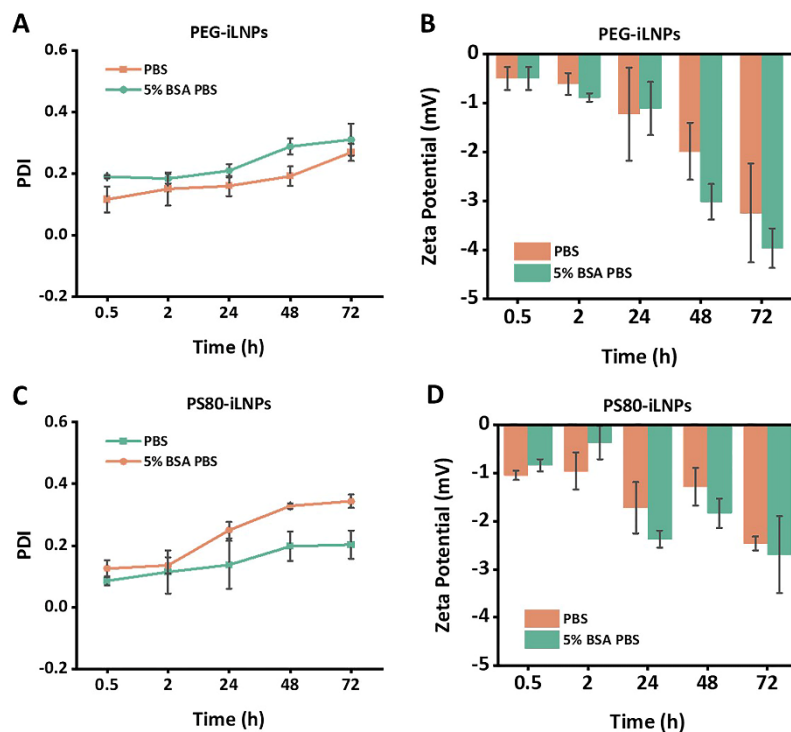

Figure S4† The PDI and  $\zeta$ -potential of PEG-iLNPs (A, B) and PS80-iLNPs (C, D) in different medium conditions with different incubation time periods characterized by DLS.

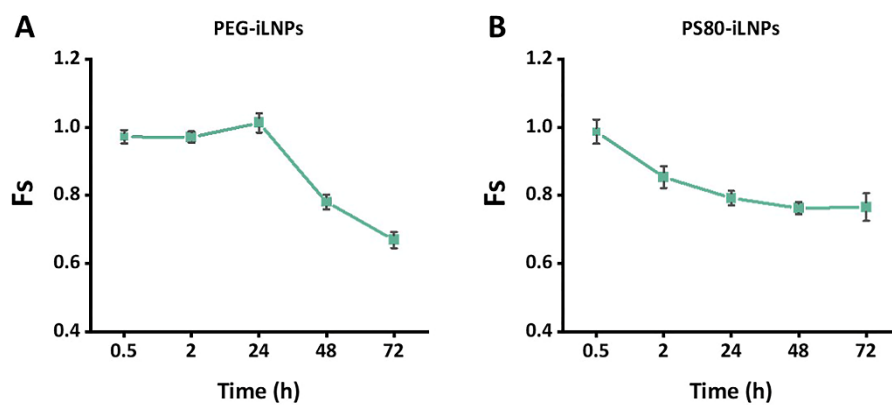

Figure S5† Fs value of PEG-iLNPs (A) and PS80-iLNPs (B) in different medium conditions with different incubation time periods.

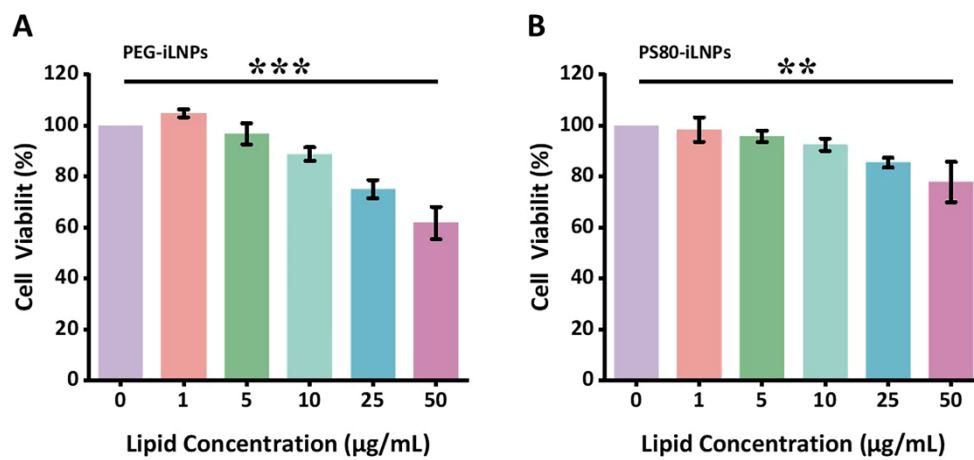

Figure S6† Cell viability of PEG-iLNPs (A) and PS80-iLNPs (B) after incubation in different lipid concentration for 24h.

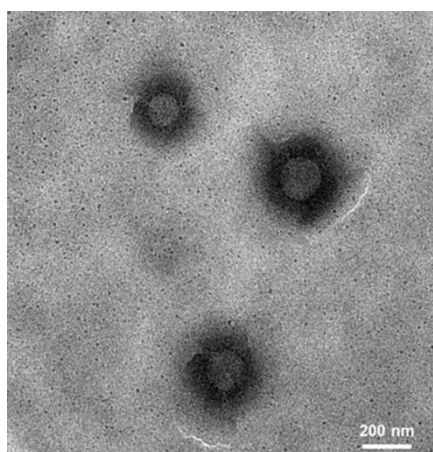

Figure S7† TEM image of PS80-iLNPs.

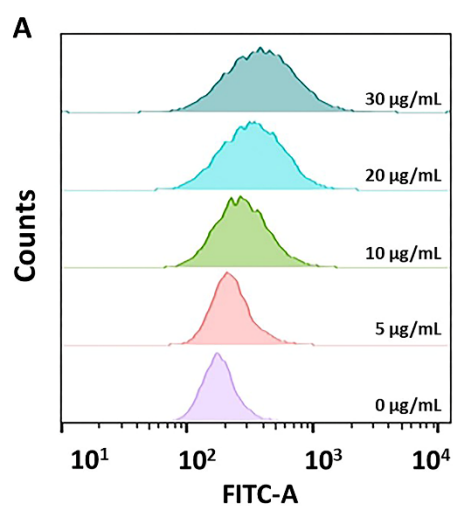

Figure S8† Flow cytometry of Hep2 cells incubated with different concentrations of PS80-iLNPs for 4 h.

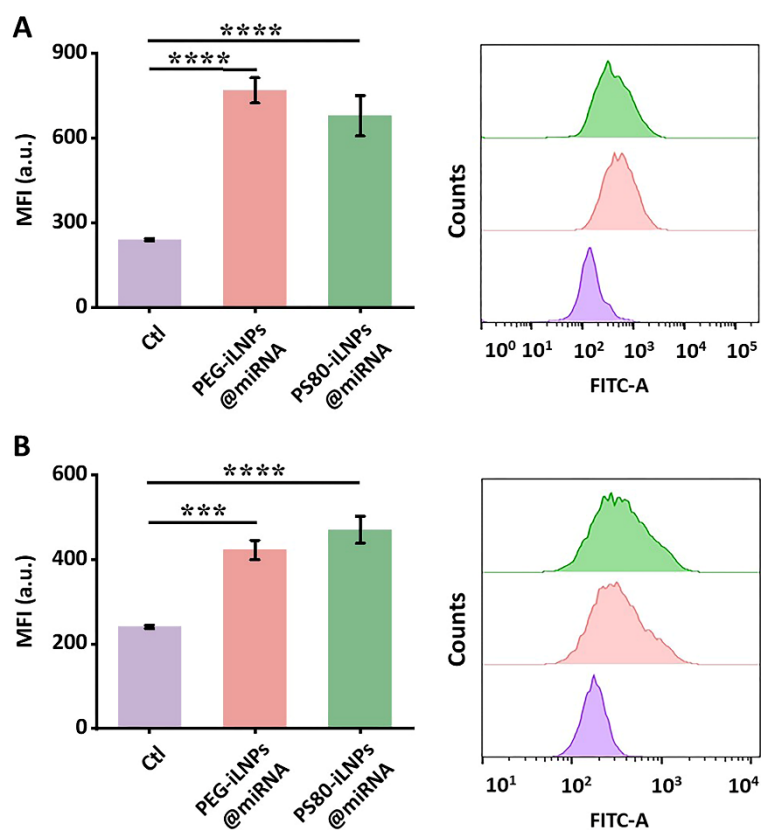

Figure S9† Cellular uptake of iLNPs in (A) serum-free DMEM and (B) 10% FBS DMEM.
